# Supplementary material
Source: PubMed Central journal article supplement (PMC4876628)
Supplement: thnov06p1043s1.pdf [file thnov06p1043s1.pdf]

## Supporting information

# Indocyanine Green-Loaded Polydopamine-Reduced Graphene Oxide Nanocomposites with Amplifying Photoacoustic and Photothermal Effects for Cancer Theranostics

Dehong Hu,<sup>1,2†</sup> Jingnan Zhang,<sup>1,†</sup> Guanhui Gao,<sup>3</sup> Zonghai Sheng,<sup>1,2\*</sup> Haodong Cui,<sup>1</sup> Lintao Cai<sup>1,\*</sup>

<sup>1</sup> Guangdong Key Laboratory of Nanomedicine, CAS Key Laboratory of Health Informatics, Shenzhen Institutes of Advanced Technology, Chinese Academy of Sciences, Shenzhen 518055, P.R. China

<sup>2</sup> Paul C. Lauterbur Research Center for Biomedical Imaging, Institute of Biomedical and Health Engineering, Shenzhen Institutes of Advanced Technology, Chinese Academy of Sciences, Shenzhen 518055, P. R. China.

<sup>3</sup> Paul-Drude Institut, Leibniz-Institut im Forschungsverbund, Hausvogteiplatz 5-7, 10117, Berlin, Germany

\*Corresponding author: Lintao Cai and Zonghai Sheng

E-mail: lt.cai@siat.ac.cn. Tel: +86 755 56392210. Fax: +86 755 56392210.

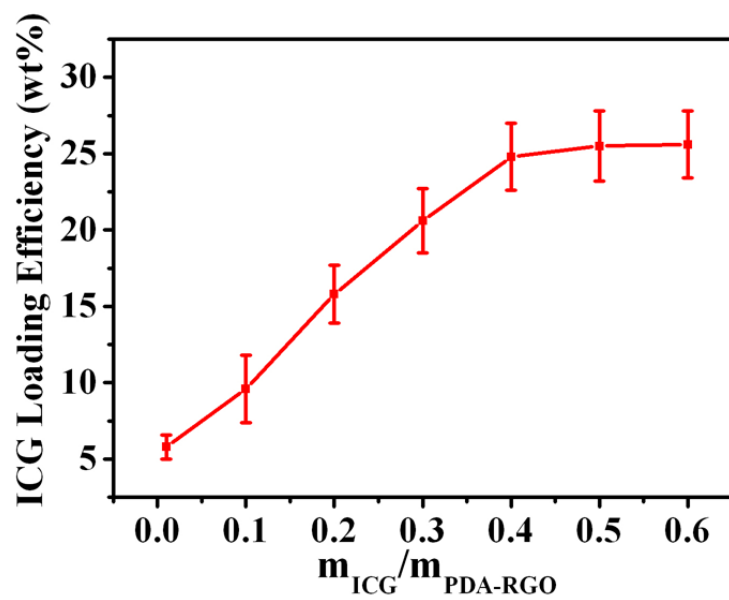

**Figure S1.** The effect of weight ratio of ICG and PDA-rGO on the ICG loading efficiency.

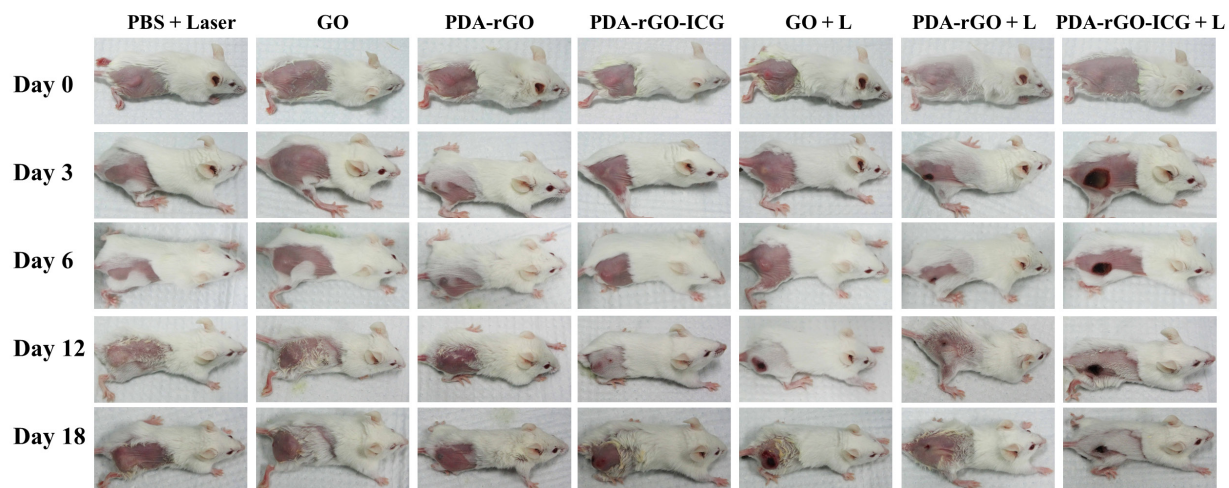

**Figure S2.** Representative photos of subcutaneous mice on 18 days after treatments.

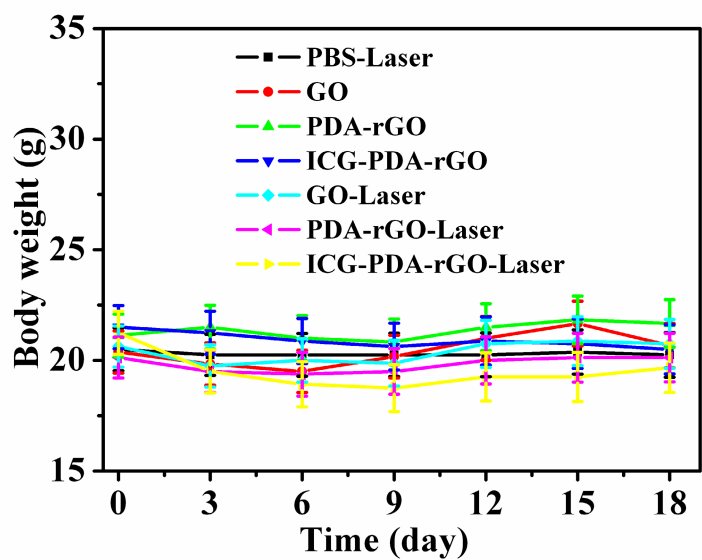

**Figure S3.** Body weights of mice at different time points after various treatments.

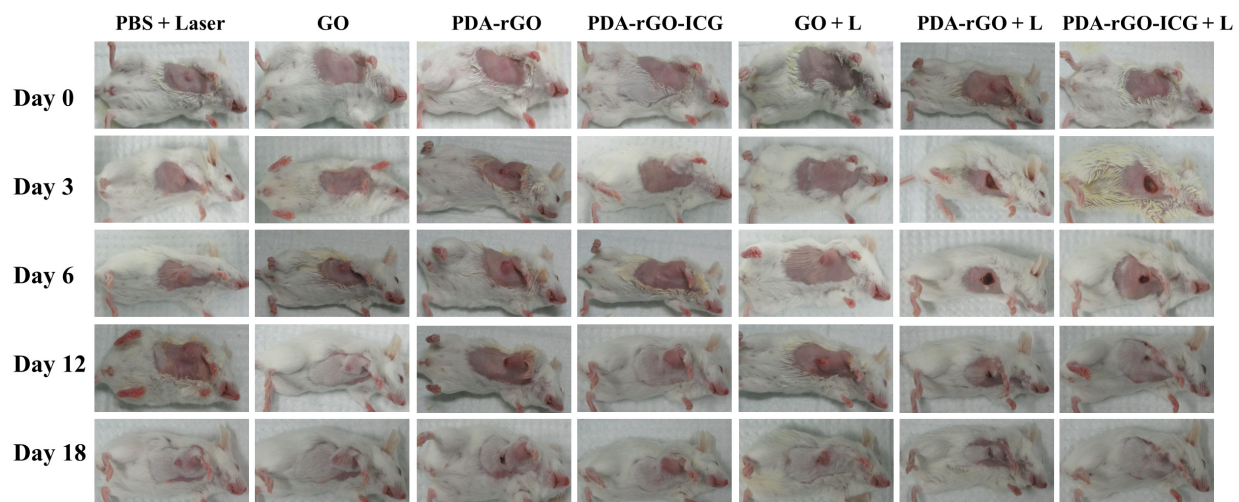

**Figure S4.** Representative photos of orthotopic mice on 18 days after treatments.

**Table S1** Blood analysis data of mice 18 days after PTT: number of white blood cells (WBC#), number of neutrophilic granulocyte (Gran#), the percentage of cells in the middle (Mid%), the concentration of hemoglobin (HGB), mean corpuscular hemoglobin concentration (MCHC), Hematocrit (HCT), mean platelet volume (MPV), platelet distribution width (PDW).

|                            | <b>WBC#</b>                      | <b>Gran#</b>                    | <b>Mid%</b>     | <b>HGB</b>       | <b>MCHC</b>      | <b>HCT</b>   | <b>MPV</b>       | <b>PDW</b> |
|----------------------------|----------------------------------|---------------------------------|-----------------|------------------|------------------|--------------|------------------|------------|
| <b>PBS + Laser</b>         | 36.35                            | 10.6                            | 18.03           | 154.25           | 382.5            | 40.3         | 9                | 15.9       |
| <b>GO</b>                  | 27.675                           | 18.89                           | 11.2            | 148.5            | 384.8            | 38.6         | 9.7              | 14.9       |
| <b>PDA-rGO</b>             | 57.1                             | 17.2                            | 18.8            | 147.5            | 382.5            | 38.6         | 9.4              | 15.4       |
| <b>PDA-rGO-ICG</b>         | 46.5                             | 24                              | 9.325           | 158              | 401.4            | 39.4         | 9.4              | 16.1       |
| <b>PDA-rGO + Laser</b>     | 53.45                            | 21.475                          | 7.8             | 157.3            | 364.7            | 43.1         | 7.4              | 15.4       |
| <b>Free ICG + Laser</b>    | 19.225                           | 2.5                             | 8.2             | 157              | 353.3            | 44.4         | 5.9              | 15.2       |
| <b>PDA-rGO-ICG + Laser</b> | 9.8                              | 2.1                             | 9.3             | 148              | 358.8            | 40.2         | 8.1              | 16.5       |
| <b>Reference interval</b>  | 4.0–10.0<br>(10 <sup>9</sup> /L) | 2.0–7.8<br>(10 <sup>9</sup> /L) | 1.0–15.0<br>(%) | 110–160<br>(g/L) | 320–360<br>(g/L) | 36–48<br>(%) | 7.4–10.4<br>(fL) | 15–17      |
